# Supplementary material for: A green liquid chromatography method for rapid determination of ergosterol in edible fungi based on matrix solid-phase dispersion extraction and a core–shell column
Source: Royal Society of Chemistry journal article supplement (doi:10.1039/d0ay00714e), 2020-01-01
Supplement: d0ay00714e1.pdf [file d0ay00714e1.pdf]

1 Supporting information  
2 for  
3 **Green liquid chromatography method for rapid determination of**  
4 **ergosterol in edible fungi based on matrix solid-phase dispersion**  
5 **extraction and core shell column**

6

7 Zhengming Qian<sup>1,2</sup>, Zi Wu<sup>1</sup>, Chunhong Li<sup>1</sup>, Guoying Tan<sup>1</sup>, Hankun Hu<sup>3</sup>, Wenjia Li<sup>1\*</sup>

8 <sup>1</sup> Key Laboratory of State Administration of Traditional Chinese Medicine, Sunshine

9 Lake Pharma Co., LTD, Dongguan, Guangdong 523850, China

10 <sup>2</sup> School of Rehabilitation, Xiangnan University, Chenzhou, China

11 <sup>3</sup>Zhongnan Hospital, Wuhan University, Wuhan, China

12

13 \* To whom correspondence should be addressed:

14 *Wenjia, Li,*

15 *Key Laboratory of State Administration of Traditional Chinese Medicine, Sunshine*

16 *Lake Pharma Co., LTD, Dongguan, Guangdong*

17 *E-mail: liwenjia1111@163.com*

19

20 The Supporting Information includes following items:

---

Page 3 Table S1. Intraday precision data

Page 4 Table S2. Interday precision data

Page 5 Table S3. Recovery data

Page 6 Table S4. Stability data

---

22

23 Table S1. Intraday precision data

| Concentration ( $\mu\text{g/mL}$ ) | No. | Peak Area | RSD (%) |
|------------------------------------|-----|-----------|---------|
| 8.42                               | 1   | 19.46     | 0.7     |
|                                    | 2   | 19.26     |         |
|                                    | 3   | 19.59     |         |
|                                    | 4   | 19.34     |         |
|                                    | 5   | 19.25     |         |
|                                    | 6   | 19.33     |         |

26 Table S2. Interday precision data

| Concentration ( $\mu\text{g/mL}$ ) | No. | Peak Area | RSD (%) |
|------------------------------------|-----|-----------|---------|
| 8.42                               | 1   | 19.13     | 0.8     |
|                                    | 2   | 19.38     |         |
|                                    | 3   | 19.34     |         |
|                                    | 4   | 19.20     |         |
|                                    | 5   | 19.59     |         |
|                                    | 6   | 19.33     |         |

28

29 Table S3. Recovery data

| Amounts in sample<br>( $\mu\text{g}$ ) | Added amounts<br>( $\mu\text{g}$ ) | Detected amounts<br>( $\mu\text{g}$ ) | Recovery<br>(%) | Mean<br>(%) | RSD<br>(%) |
|----------------------------------------|------------------------------------|---------------------------------------|-----------------|-------------|------------|
| 33.08                                  | 31.59                              | 66.26                                 | 105.01          |             |            |
| 33.08                                  | 31.59                              | 65.92                                 | 103.95          |             |            |
| 33.09                                  | 31.59                              | 64.41                                 | 99.14           | 100.4       | 3.23       |
| 33.09                                  | 31.59                              | 63.94                                 | 97.70           |             |            |
| 33.08                                  | 31.59                              | 64.41                                 | 99.19           |             |            |
| 33.08                                  | 31.59                              | 63.89                                 | 97.60           |             |            |

30

31

33

34 Table S4. Stability data

| Sample | Time (h) | Concentration (mg/g) | Mean (mg/g) | RSD (%) |
|--------|----------|----------------------|-------------|---------|
| S1     | 0        | 3.71                 | 3.53        | 2.29    |
|        | 2        | 3.49                 |             |         |
|        | 4        | 3.48                 |             |         |
|        | 6        | 3.53                 |             |         |
|        | 8        | 3.51                 |             |         |
|        | 10       | 3.51                 |             |         |
|        | 12       | 3.48                 |             |         |

35

36
